# Supplementary material for: Spatial Distributions, Sources, Potential Risks of Multi-Trace Metal/Metalloids in Street Dusts from Barbican Downtown Embracing by Xi’an Ancient City Wall (NW, China)
Source: MDPI journal article supplement (doi:10.3390/ijerph16162992), 2019-08-20
Supplement: s1 [file s1]

**Table S1** The potential risk classification

| Type                        | Degree of risk      |               |                   |              |                |
|-----------------------------|---------------------|---------------|-------------------|--------------|----------------|
|                             | Low risk            | Moderate risk | Considerable risk | High risk    | Extremely risk |
| RI                          | <40                 | 40~80         | 80~160            | 160~320      | >320           |
| E <sub>r</sub> <sup>i</sup> | <10                 | 10~20         | 20~40             | 40~80        | >80            |
| Type                        | Degree of pollution |               |                   |              |                |
|                             | Slight              | Low           | Moderate          | Considerable |                |
| C <sub>f</sub> <sup>i</sup> | <1                  | 1~3           | 3~6               | >6           |                |
| C <sub>d</sub>              | <11                 | 11~22         | 22~24             | >44          |                |

**Table S2** Parameters for health risk assessment

| Parametere          | Significant                                            | Unit                     | Value                                         |
|---------------------|--------------------------------------------------------|--------------------------|-----------------------------------------------|
| ADD <sub>ing</sub>  | Daily exposure amount of metals through ingestion      | mg/kg•d <sup>-1</sup>    |                                               |
| ADD <sub>inh</sub>  | Daily exposure amount of metals through inhalation     | mg/kg•d <sup>-1</sup>    |                                               |
| ADD <sub>derm</sub> | Daily exposure amount of metals through dermal contact | mg/kg•d <sup>-1</sup>    |                                               |
| LADD                | Lifetime average daily dose                            | mg/kg•BW•d <sup>-1</sup> |                                               |
| HQ                  | Hazard quotient                                        | dimensionless            |                                               |
| HI                  | Hazard Index                                           | dimensionless            |                                               |
| RISK                | Cancer risk                                            | dimensionless            |                                               |
| 95% UCL             | 95% upper confidence limit                             |                          |                                               |
| X                   | Arithmetic mean of log-transformed data                |                          |                                               |
| s                   | Standard deviation of log-transformed data             |                          |                                               |
| H                   | H-statistic                                            |                          |                                               |
| n                   | Number of samples                                      |                          |                                               |
| C                   | Exposure level of metal in dust                        | mg/kg                    | 95% UCL                                       |
| IngR                | Intake frequency of hand-mouth                         | mg/d                     | 200(children)100(adults)                      |
| InhR                | Breathing rate                                         | m <sup>3</sup> /d        | 7.6(children)20(adults)                       |
| CF                  | Conversion coefficient                                 | m <sup>3</sup> /mg       | 1×10 <sup>-6</sup>                            |
| EF                  | Exposure frequency                                     | d/a                      | 350                                           |
| ED                  | Exposure time                                          | a                        | 6(children)24(adults)                         |
| BW                  | Average weight                                         | kg                       | 15.9(children)56.8(adults)                    |
| AT                  | Average total exposure time                            | d                        | ED×365d(non-carcinogenic)70×365(carcinogenic) |
| PEF                 | Particulate matter emission factor                     | m <sup>3</sup> /kg       | 1.36×10 <sup>9</sup>                          |
| SA                  | Exposure of skin surface area                          | cm <sup>2</sup>          | 2160(children)4220(adults)                    |
| SL                  | Skin sticky limit                                      | mg/(cm <sup>2</sup> .d)  | 0.2(children)0.07(adults)                     |
| ABS                 | Skin absorptive factor                                 |                          | As is 0.03, the rest is 0.001                 |

**Table S3** Reference dose (RfD) and carcinogenic slope factor (SF) for different exposure routes of toxic metals

| Metals              | As       | Co       | Cr       | Cu       | Ni       | Pb       | Sr       | Zn       | Ba       | Mn       | V        |
|---------------------|----------|----------|----------|----------|----------|----------|----------|----------|----------|----------|----------|
| RfD <sub>ing</sub>  | 3.00E-04 | 2.00E-02 | 3.00E-03 | 4.00E-02 | 2.00E-02 | 3.50E-03 | 3.00E-01 | 3.00E-01 | 7.00E-02 | 4.60E-02 | 7.00E-03 |
| RfD <sub>inh</sub>  | 3.01E-04 | 5.71E-06 | 2.86E-05 | 4.02E-02 | 2.06E-02 | 3.52E-03 | 3.00E-01 | 3.00E-01 | 1.43E-04 | 1.43E-05 | 7.00E-03 |
| RfD <sub>derm</sub> | 1.23E-04 | 1.60E-02 | 5.00E-05 | 1.20E-02 | 5.40E-04 | 5.25E-04 | 6.00E-02 | 6.00E-02 | 4.90E-03 | 1.84E-03 | 7.00E-05 |
| SF <sub>inh</sub>   | 1.51E+01 | 9.80E+00 | 4.20E+01 |          | 8.40E-01 | 4.20E-02 |          |          |          |          |          |

**Table S4** Comparison of metals concentration in the SD of various cities worldwide (unit in mg kg<sup>-1</sup>)

| City                                    | CaO      | Fe <sub>2</sub> O <sub>3</sub> | K <sub>2</sub> O | MgO       | Na <sub>2</sub> O | SiO <sub>2</sub> | Al <sub>2</sub> O <sub>3</sub> | As    | Ba     | Bi   | Ce    | Co    | Cr     | Cu    |
|-----------------------------------------|----------|--------------------------------|------------------|-----------|-------------------|------------------|--------------------------------|-------|--------|------|-------|-------|--------|-------|
| Xi'an, China <sup>a</sup>               | 8.17%    | 5.36%                          | 1.45%            | 1.96%     | 2.52%             | 37.18%           | 8.04%                          | 11.73 | 748.23 |      | 88.59 | 13.71 | 175.18 | 50.91 |
| Xining, China <sup>b</sup>              | 6.06%    | 4.22%                          | 1.17%            | 2.29%     | 2.76%             | 30.9%            | 5.2%                           | 6.00  | 344.43 | 2.86 | 61.56 | 24.6  | 507.77 | 30.32 |
| Beijing, China <sup>c</sup>             | 63.9g/kg | 27.3g/kg                       | 13.7g/kg         | 14.9g/kg  | 11.2g/kg          |                  | 45.7g/kg                       |       | 593    |      |       | 11.5  | 72.1   | 98.0  |
| Xi'an, China <sup>d</sup>               |          |                                |                  |           |                   |                  |                                | 10.62 |        |      |       |       | 167.28 | 94.98 |
| Delhi, India <sup>e</sup>               |          |                                |                  |           |                   |                  |                                |       |        |      |       |       | 148.8  | 191.7 |
| Buenos Aires,<br>Argentina <sup>f</sup> |          | 10.97 g/kg                     |                  | 1.09 g/kg |                   |                  | 12.71 g/kg                     |       | 346    |      |       |       | 91     | 190   |
| Banja Luka,<br>Serbia <sup>g</sup>      |          |                                |                  |           |                   |                  |                                |       |        |      |       | 63.1  | 34.6   | 77.7  |
| Tokyo, Japan <sup>h</sup>               |          |                                |                  |           |                   |                  |                                |       |        |      |       |       | 52.3   |       |
| Tokyo, Japan <sup>i</sup>               | 2.25% Ca | 1.00% Fe                       | 0.69% K          | 0.4% Mg   | 0.83% Na          |                  | 1.57% Al                       |       | 208    |      |       | 4.69  | 67.8   | 304   |

<sup>a</sup> This study.

<sup>b</sup> Li, XP, ZhangM, GaoY, ZhangYC, Zhang X, Yan XY, Wang S, Yang R, Liu B, Yu HT, (2018). Urban street dust bound 24 potentially toxic metal/metalloids (PTMs) from Xining valley-city, NW China: Spatial occurrences, sources and health risks, Ecotoxicol. Environ. Safe. 162, 474-487

<sup>c</sup> Tang, Y., Han, G.L., (2017). Characteristics of major elements and heavy metals in atmospheric dust in Beijing, China. J. Geochem. Explor. 176, 114-119.

<sup>d</sup> Yongming, H., Peixuan, D., Junji, C. and Posmentier, E.S., (2006). Multivariate analysis of heavy metal contamination in urban dusts of Xi'an, Central China. Sci. Total Environ., 355(1-3), 176-186.

<sup>e</sup> Suryawanshi, P.V., Rajaram, B.S., Bhanarkar, A.D., Chalapati, Rao, C.V., (2016). Determining heavy metal contamination of road dust in Delhi, India. Atmosfera 29 (3), 221-234.

<sup>f</sup> Fabián, G.F., Darío, R.G., Laura, D., Patricia, P., Ana, F., (2011). Metals associated with airborne particulate matter in road dust and tree bark collected in a megacity (Buenos Aires, Argentina). Ecol. Indic. 11 (2), 240-247.

<sup>g</sup> Biljana, Š., Snežana, M., Milan, M., (2012). Multielement profiles of soil, road dust, tree bark and wood-rotten fungi collected at various distances from high-frequency road in urban area. Ecol. Indic. 13 (1), 168-177.

<sup>h</sup> Anugrah, R.W., Aaron, K.O., Kentaro, T., Ryuichi, S., Shigeru, O., (2012). Metal contents and Pb isotopes in road-side dust and sediment of Japan. J. Geochem. Explor. 118, 68-76.

<sup>i</sup> Jun, Y., Kumiko, Y., Ayumi, Y., Yuri, I., Takaya, K., Kodai, M., Mai, T., Atsushi, T., (2014). Lead and other elements in house dust of Japanese residences-source of lead and health risks due to metal exposure. Environ. Pollut. 189, 223-228.

**Table S4** Continued

| City                                    | Ga    | La    | Mn     | Nb    | Ni    | Pb     | Rb    | Sb   | Sn    | Sr     | Th    | Ti      | U    | V     | Y     | Zn     | Zr     |
|-----------------------------------------|-------|-------|--------|-------|-------|--------|-------|------|-------|--------|-------|---------|------|-------|-------|--------|--------|
| Xi'an, China <sup>a</sup>               | 14.54 | 31.92 | 486.42 | 11.90 | 21.04 | 93.45  | 44.19 |      |       | 186.54 |       | 2949.18 |      | 69.28 | 18.57 | 272.04 | 120.13 |
| Xining, China <sup>b</sup>              | 18.54 | 19.71 | 377.69 | 12.95 | 23.47 | 62.82  | 58.41 | 8.91 | 22.81 | 245.08 | 11.16 | 1977.87 | 4.6  | 51.78 | 25.49 | 104.84 | 194.74 |
| Beijing, China <sup>c</sup>             |       |       |        |       | 37.6  | 119    |       |      |       |        |       |         |      | 61.7  |       | 408    |        |
| Xi'an, China <sup>d</sup>               |       |       | 687    |       |       | 230.52 |       | 5.41 |       |        |       |         |      |       |       | 421.46 |        |
| Delhi, India <sup>e</sup>               |       |       |        |       | 36.4  | 120.7  |       |      |       |        |       |         |      |       |       | 284.5  |        |
| Buenos Aires,<br>Argentina <sup>f</sup> |       |       | 569    |       | 50    | 208    |       |      |       |        |       |         |      |       |       | 751    |        |
| Banja Luka,<br>Serbia <sup>g</sup>      |       |       | 668    |       | 41.4  | 608    |       |      |       |        |       |         |      |       |       | 272    |        |
| Tokyo, Japan <sup>h</sup>               |       |       |        |       | 29.6  | 245    |       |      |       |        |       |         |      |       |       | 1888   |        |
| Tokyo, Japan <sup>i</sup>               |       |       | 226    |       | 59.6  | 57.9   |       | 10.1 | 18.4  | 66.8   |       | 0.15%Ti | 0.40 | 24.7  |       | 920    |        |

<sup>a</sup> This study.

<sup>b</sup> Li, XP, ZhangM, GaoY, ZhangYC, Zhang X, Yan XY, Wang S, Yang R, Liu B, Yu HT, (2018). Urban street dust bound 24 potentially toxic metal/metalloids (PTMs) from Xining valley-city, NW China: Spatial occurrences, sources and health risks, *Ecotoxicol. Environ. Safe.* 162, 474-487

<sup>c</sup> Tang, Y., Han, G.L., (2017). Characteristics of major elements and heavy metals in atmospheric dust in Beijing, China. *J. Geochem. Explor.* 176, 114-119.

<sup>d</sup> Yongming, H., Peixuan, D., Junji, C. and Posmentier, E.S., (2006). Multivariate analysis of heavy metal contamination in urban dusts of Xi'an, Central China. *Sci. Total Environ.*, 355(1-3), 176-186.

<sup>e</sup> Suryawanshi, P.V., Rajaram, B.S., Bhanarkar, A.D., Chalapati, Rao, C.V., (2016). Determining heavy metal contamination of road dust in Delhi, India. *Atmósfera* 29 (3), 221-234.

<sup>f</sup> Fabián, G.F., Darío, R.G., Laura, D., Patricia, P., Ana, F., (2011). Metals associated with airborne particulate matter in road dust and tree bark collected in a megacity (Buenos Aires, Argentina). *Ecol. Indic.* 11 (2), 240-247.

<sup>g</sup> Biljana, Š., Snežana, M., Milan, M., (2012). Multielement profiles of soil, road dust, tree bark and wood-rotten fungi collected at various distances from high-frequency road in urban area. *Ecol. Indic.* 13 (1), 168-177.

<sup>h</sup> Anugrah, R.W., Aaron, K.O., Kentaro, T., Ryuichi, S., Shigeru, O., (2012). Metal contents and Pb isotopes in road-side dust and sediment of Japan. *J. Geochem. Explor.* 118, 68-76.

<sup>i</sup> Jun, Y., Kumiko, Y., Ayumi, Y., Yuri, I., Takaya, K., Kodai, M., Mai, T., Atsushi, T., (2014). Lead and other elements in house dust of Japanese residences-source of lead and health risks due to metal exposure. *Environ. Pollut.* 189, 223-228.

**Table S5** The potential ecological risk assessment of street dust.

| Index   |      | As    | Co   | Cr    | Cu    | Mn   | Ni     | Pb    | Sr   | Ti   | V    | Zn    |
|---------|------|-------|------|-------|-------|------|--------|-------|------|------|------|-------|
| $C_f^i$ | Max  | 3.27  | 1.89 | 10.46 | 14.46 | 0.94 | 3.83   | 12.57 | 1.57 | 1.02 | 3.48 | 62.07 |
|         | Min  | 0.22  | 0.75 | 1.73  | 0.73  | 0.62 | 0.21   | 1.77  | 0.33 | 0.58 | 2.22 | 1.47  |
|         | Mean | 0.98  | 0.98 | 2.34  | 1.89  | 0.74 | 0.66   | 4.06  | 0.77 | 0.72 | 2.89 | 3.89  |
| $C_d$   | Max  |       |      |       |       |      | 77.65  |       |      |      |      |       |
|         | Min  |       |      |       |       |      | 13.24  |       |      |      |      |       |
|         | Mean |       |      |       |       |      | 19.9   |       |      |      |      |       |
| $E_r^i$ | Max  | 32.67 | 9.43 | 20.93 | 72.3  | 0.94 | 19.14  | 62.85 | 1.57 | 1.02 | 6.97 | 62.07 |
|         | Min  | 2.17  | 3.75 | 3.45  | 3.65  | 0.62 | 1.06   | 8.85  | 0.33 | 0.58 | 4.43 | 1.47  |
|         | Mean | 9.78  | 4.9  | 4.67  | 9.43  | 0.74 | 3.29   | 20.32 | 0.77 | 0.72 | 5.77 | 3.89  |
| $RI$    | Max  |       |      |       |       |      | 135.29 |       |      |      |      |       |
|         | Min  |       |      |       |       |      | 40.15  |       |      |      |      |       |
|         | Mean |       |      |       |       |      | 64.26  |       |      |      |      |       |

**Table S6** The correlation analysis of metals in Street dusts

|    | As      | Ba     | Ce      | Co     | Cr     | Cu     | Ga     | La     | Mn     | Nb     | Ni     | Pb     | Rb     | Sr     | Ti     | V      | Y      | Zn   | Zr   |
|----|---------|--------|---------|--------|--------|--------|--------|--------|--------|--------|--------|--------|--------|--------|--------|--------|--------|------|------|
| As | 1.00    |        |         |        |        |        |        |        |        |        |        |        |        |        |        |        |        |      |      |
| Ba | -0.11   | 1.00   |         |        |        |        |        |        |        |        |        |        |        |        |        |        |        |      |      |
| Ce | -0.36** | 0.63** | 1.00    |        |        |        |        |        |        |        |        |        |        |        |        |        |        |      |      |
| Co | 0.16    | 0.28** | 0.27**  | 1.00   |        |        |        |        |        |        |        |        |        |        |        |        |        |      |      |
| Cr | 0.14    | 0.27** | 0.30**  | 0.52** | 1.00   |        |        |        |        |        |        |        |        |        |        |        |        |      |      |
| Cu | 0.27**  | 0.14   | 0.11    | 0.05   | 0.28** | 1.00   |        |        |        |        |        |        |        |        |        |        |        |      |      |
| Ga | 0.34**  | 0.15   | 0.12    | 0.13   | 0.31** | 0.71** | 1.00   |        |        |        |        |        |        |        |        |        |        |      |      |
| La | -0.02   | 0.24*  | 0.27**  | 0.05   | 0.20** | 0.15   | 0.26** | 1.00   |        |        |        |        |        |        |        |        |        |      |      |
| Mn | 0.17    | 0.22*  | 0.16    | 0.43** | 0.35** | 0.12   | 0.10   | 0.02   | 1.00   |        |        |        |        |        |        |        |        |      |      |
| Nb | 0.26**  | 0.28** | 0.30**  | 0.27** | 0.40** | 0.52** | 0.69** | 0.19*  | 0.33** | 1.00   |        |        |        |        |        |        |        |      |      |
| Ni | 0.40**  | 0.15   | 0.19*   | 0.25** | 0.45** | 0.70** | 0.90** | 0.31** | 0.29** | 0.77** | 1.00   |        |        |        |        |        |        |      |      |
| Pb | -0.11   | 0.44** | 0.42**  | 0.41** | 0.45** | 0.51** | 0.66** | 0.26** | 0.17   | 0.52** | 0.59** | 1.00   |        |        |        |        |        |      |      |
| Rb | 0.29**  | 0.11   | 0.16    | -0.18* | 0.16   | 0.67** | 0.84** | 0.28** | 0.01   | 0.62** | 0.81** | 0.45** | 1.00   |        |        |        |        |      |      |
| Sr | 0.24**  | 0.07   | 0.09    | -0.12  | 0.01   | 0.63** | 0.80** | 0.16   | 0.10   | 0.46** | 0.72** | 0.36** | 0.80** | 1.00   |        |        |        |      |      |
| Ti | -0.04   | 0.44** | 0.45**  | 0.17   | 0.35** | 0.18   | 0.23** | 0.35** | 0.05   | 0.46** | 0.26** | 0.35** | 0.29** | -0.03  | 1.00   |        |        |      |      |
| V  | -0.14   | 0.42** | 0.55**  | 0.23** | 0.35** | 0.06   | 0.18   | 0.42** | 0.05   | 0.37** | 0.22** | 0.35** | 0.23** | -0.12  | 0.80** | 1.00   |        |      |      |
| Y  | 0.31**  | 0.21** | 0.16    | 0.00   | 0.14   | 0.65** | 0.85** | 0.32** | 0.04   | 0.62** | 0.79** | 0.53** | 0.82** | 0.81** | 0.27** | 0.15   | 1.00   |      |      |
| Zn | 0.37**  | 0.14   | -0.27** | 0.18   | 0.05   | 0.29** | 0.39** | 0.01   | 0.12   | 0.21   | 0.32** | 0.26** | 0.10   | 0.23   | -0.13  | -0.23* | 0.27** | 1.00 |      |
| Zr | 0.27**  | 0.18   | 0.19**  | -0.12  | 0.20** | 0.70** | 0.86** | 0.29** | -0.02  | 0.70** | 0.81** | 0.49** | 0.93** | 0.80** | 0.35** | 0.21*  | 0.89** | 0.15 | 1.00 |

Notes: \*Correlation is significant at the 0.05 level(2-tailed). \*\*Correlation is significant at the 0.01 level(2-tailed).

**Table S7** Varimax rotated factor matrix

| Variable      | Factor 1    | Factor 3    | Factor 4     | Communalities |
|---------------|-------------|-------------|--------------|---------------|
| LogAs         | 0.32        | 0.25        | <b>-0.66</b> | 0.79          |
| LogBa         | 0.11        | 0.21        | <b>0.43</b>  | 0.78          |
| LogCe         | 0.11        | 0.09        | 0.47         | 0.79          |
| LogCo         | -0.07       | <b>0.81</b> | 0.05         | 0.81          |
| LogCr         | 0.17        | <b>0.59</b> | -0.03        | 0.69          |
| LogCu         | <b>0.74</b> | 0.15        | 0.05         | 0.62          |
| LogGa         | <b>0.93</b> | 0.26        | 0.03         | 0.96          |
| LogLa         | 0.24        | 0.05        | 0.07         | 0.41          |
| LogMn         | 0.06        | <b>0.49</b> | -0.12        | 0.62          |
| LogNb         | <b>0.66</b> | 0.33        | -0.11        | 0.85          |
| LogNi         | <b>0.87</b> | 0.37        | -0.14        | 0.96          |
| LogPb         | 0.52        | 0.51        | <b>0.58</b>  | 0.95          |
| LogRb         | <b>0.93</b> | -0.13       | -0.06        | 0.96          |
| LogSr         | <b>0.90</b> | -0.11       | 0.05         | 0.96          |
| LogTi         | 0.17        | 0.07        | 0.07         | 0.79          |
| LogV          | 0.05        | 0.13        | 0.10         | 0.95          |
| LogY          | <b>0.91</b> | 0.02        | 0.05         | 0.90          |
| LogZn         | 0.28        | <b>0.45</b> | -0.06        | 0.75          |
| LogZr         | <b>0.95</b> | -0.10       | -0.01        | 0.98          |
| % of Variance | 34.80       | 11.71       | 6.69         |               |
| Cumulative %  | 34.80       | 61.14       | 67.83        |               |

Extraction Method: Generalized Least Squares.

Rotation Method: Varimax with Kaiser Normalization, Rotation converged in 5 iterations.

**Table S8** Daily exposure levels of children and adults to trace metals in dust under different exposure routes

|       | ADD <sub>ing</sub> |          | ADD <sub>inh</sub> |          | ADD <sub>derm</sub> |          | LADD     |          |
|-------|--------------------|----------|--------------------|----------|---------------------|----------|----------|----------|
|       | Adults             | Children | Adults             | Children | Adults              | Children | Adults   | Children |
| As    | 2.09E-05           | 1.49E-04 | 3.08E-09           | 4.17E-09 | 6.18E-08            | 3.23E-07 | 1.05E-09 | 3.85E-10 |
| Co    | 2.37E-05           | 1.69E-04 | 3.49E-09           | 4.73E-09 | 7.00E-08            | 3.66E-07 | 1.19E-09 | 4.06E-10 |
| Cr    | 3.13E-04           | 2.24E-03 | 4.60E-08           | 6.25E-08 | 9.24E-07            | 4.83E-06 | 1.58E-08 | 5.36E-09 |
| Cu    | 9.60E-05           | 6.86E-04 | 1.41E-08           | 1.92E-08 | 2.84E-07            | 1.48E-06 |          |          |
| Ni    | 3.86E-05           | 2.76E-04 | 5.67E-09           | 7.70E-09 | 1.14E-07            | 5.95E-07 | 1.95E-09 | 6.6E-10  |
| Pb    | 1.69E-04           | 1.21E-03 | 2.48E-08           | 3.37E-08 | 4.99E-07            | 2.61E-06 | 8.51E-09 | 2.89E-09 |
| Zn    | 4.11E-04           | 2.94E-03 | 6.05E-08           | 8.21E-08 | 1.21E-06            | 6.34E-06 |          |          |
| Sr    | 3.27E-04           | 2.34E-03 | 4.81E-08           | 6.53E-08 | 9.67E-07            | 5.05E-06 |          |          |
| Ba    | 1.30E-03           | 9.26E-03 | 1.91E-07           | 2.59E-07 | 3.83E-06            | 2.00E-05 |          |          |
| Mn    | 8.30E-04           | 5.93E-03 | 1.22E-07           | 1.66E-07 | 2.45E-06            | 1.28E-05 |          |          |
| V     | 1.18E-04           | 8.45E-04 | 1.74E-08           | 2.36E-08 | 3.49E-07            | 1.82E-06 |          |          |
| Total | 3.65E-03           | 2.60E-04 | 5.36E-07           | 7.28E-07 | 1.08E-05            | 5.62E-05 | 2.85E-08 | 9.67E-09 |

**Table S9** The risk index of children and adults of trace metals in dust under different exposure

| Human    | Element | HQing    | HQinh    | HQdermal | HI       | Risk     |
|----------|---------|----------|----------|----------|----------|----------|
| Adults   | As      | 6.97E-02 | 1.02E-05 | 5.02E-04 | 7.02E-02 | 1.59E-08 |
|          | Co      | 1.18E-03 | 6.10E-04 | 4.38E-06 | 1.79E-03 | 1.17E-08 |
|          | Cr      | 1.04E-01 | 1.61E-03 | 1.54E-02 | 1.21E-01 | 6.63E-07 |
|          | Cu      | 2.40E-03 | 3.51E-07 | 2.36E-05 | 2.42E-03 |          |
|          | Ni      | 1.93E-03 | 2.75E-07 | 2.11E-04 | 2.14E-03 | 1.63E-09 |
|          | Pb      | 4.82E-02 | 7.06E-06 | 9.50E-04 | 4.92E-02 | 3.58E-10 |
|          | Zn      | 1.37E-03 | 2.02E-07 | 2.02E-05 | 1.39E-03 |          |
|          | Sr      | 5.45E-04 | 8.02E-08 | 8.06E-06 | 5.53E-04 |          |
|          | Ba      | 1.85E-02 | 1.33E-03 | 7.82E-04 | 2.06E-02 |          |
|          | Mn      | 1.80E-02 | 8.54E-03 | 1.33E-03 | 2.79E-02 |          |
|          | V       | 1.69E-02 | 2.48E-06 | 4.99E-03 | 2.19E-02 |          |
|          | Total   | 2.83E-01 | 1.21E-02 | 2.42E-02 | 3.19E-01 | 6.92E-07 |
| Children | As      | 4.98E-01 | 1.39E-05 | 2.62E-03 | 5.01E-01 | 5.40E-09 |
|          | Co      | 8.47E-03 | 8.29E-04 | 2.29E-05 | 9.32E-03 | 3.97E-09 |
|          | Cr      | 7.45E-01 | 2.18E-03 | 8.05E-02 | 8.28E-01 | 2.25E-07 |
|          | Cu      | 1.71E-02 | 4.77E-07 | 1.23E-04 | 1.72E-02 |          |
|          | Ni      | 1.38E-02 | 3.74E-07 | 1.10E-03 | 1.49E-02 | 5.55E-10 |
|          | Pb      | 3.45E-01 | 7.40E-04 | 4.96E-03 | 3.51E-01 | 1.21E-10 |
|          | Zn      | 9.79E-03 | 2.74E-07 | 1.06E-04 | 9.90E-03 |          |
|          | Sr      | 3.90E-03 | 1.09E-07 | 4.21E-05 | 3.94E-03 |          |
|          | Ba      | 1.32E-01 | 1.81E-03 | 4.08E-03 | 1.38E-01 |          |
|          | Mn      | 1.29E-01 | 1.16E-02 | 6.96E-03 | 1.48E-01 |          |
|          | V       | 1.21E-01 | 3.37E-06 | 2.61E-02 | 1.47E-01 |          |
|          | Total   | 2.02E+00 | 1.72E-02 | 1.27E-01 | 2.17E+00 | 2.35E-07 |
