# Supplementary material for: Spatial Distributions, Sources, Potential Risks of Multi-Trace Metal/Metalloids in Street Dusts from Barbican Downtown Embracing by Xi’an Ancient City Wall (NW, China)
Source: MDPI journal article supplement (doi:10.3390/ijerph16162992), 2019-08-20
Supplement: s1 [file s1]

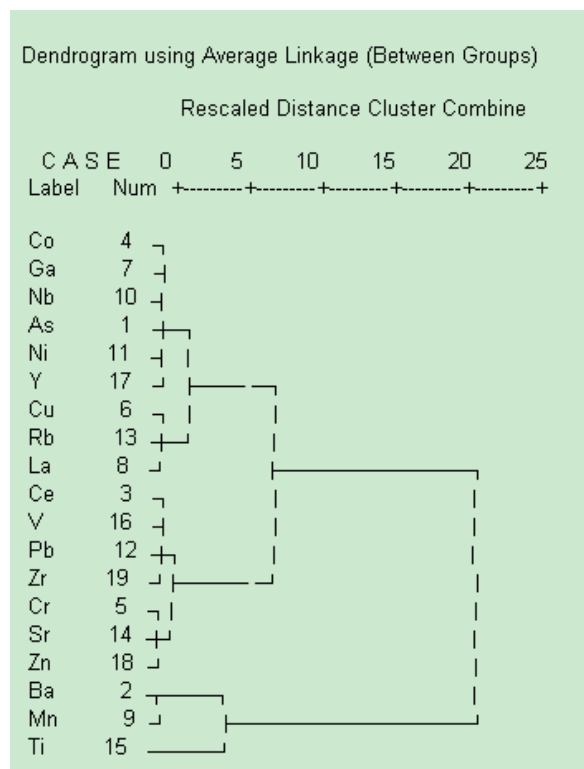

**Fig.S1** Hierarchical clustering analysis of trace metals in street dusts from Xi'an  
(Cluster method: Between-groups linkage; Interval: Squared Euclidean distance)

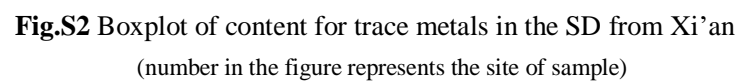

**Fig.S2** Boxplot of content for trace metals in the SD from Xi'an  
(number in the figure represents the site of sample)

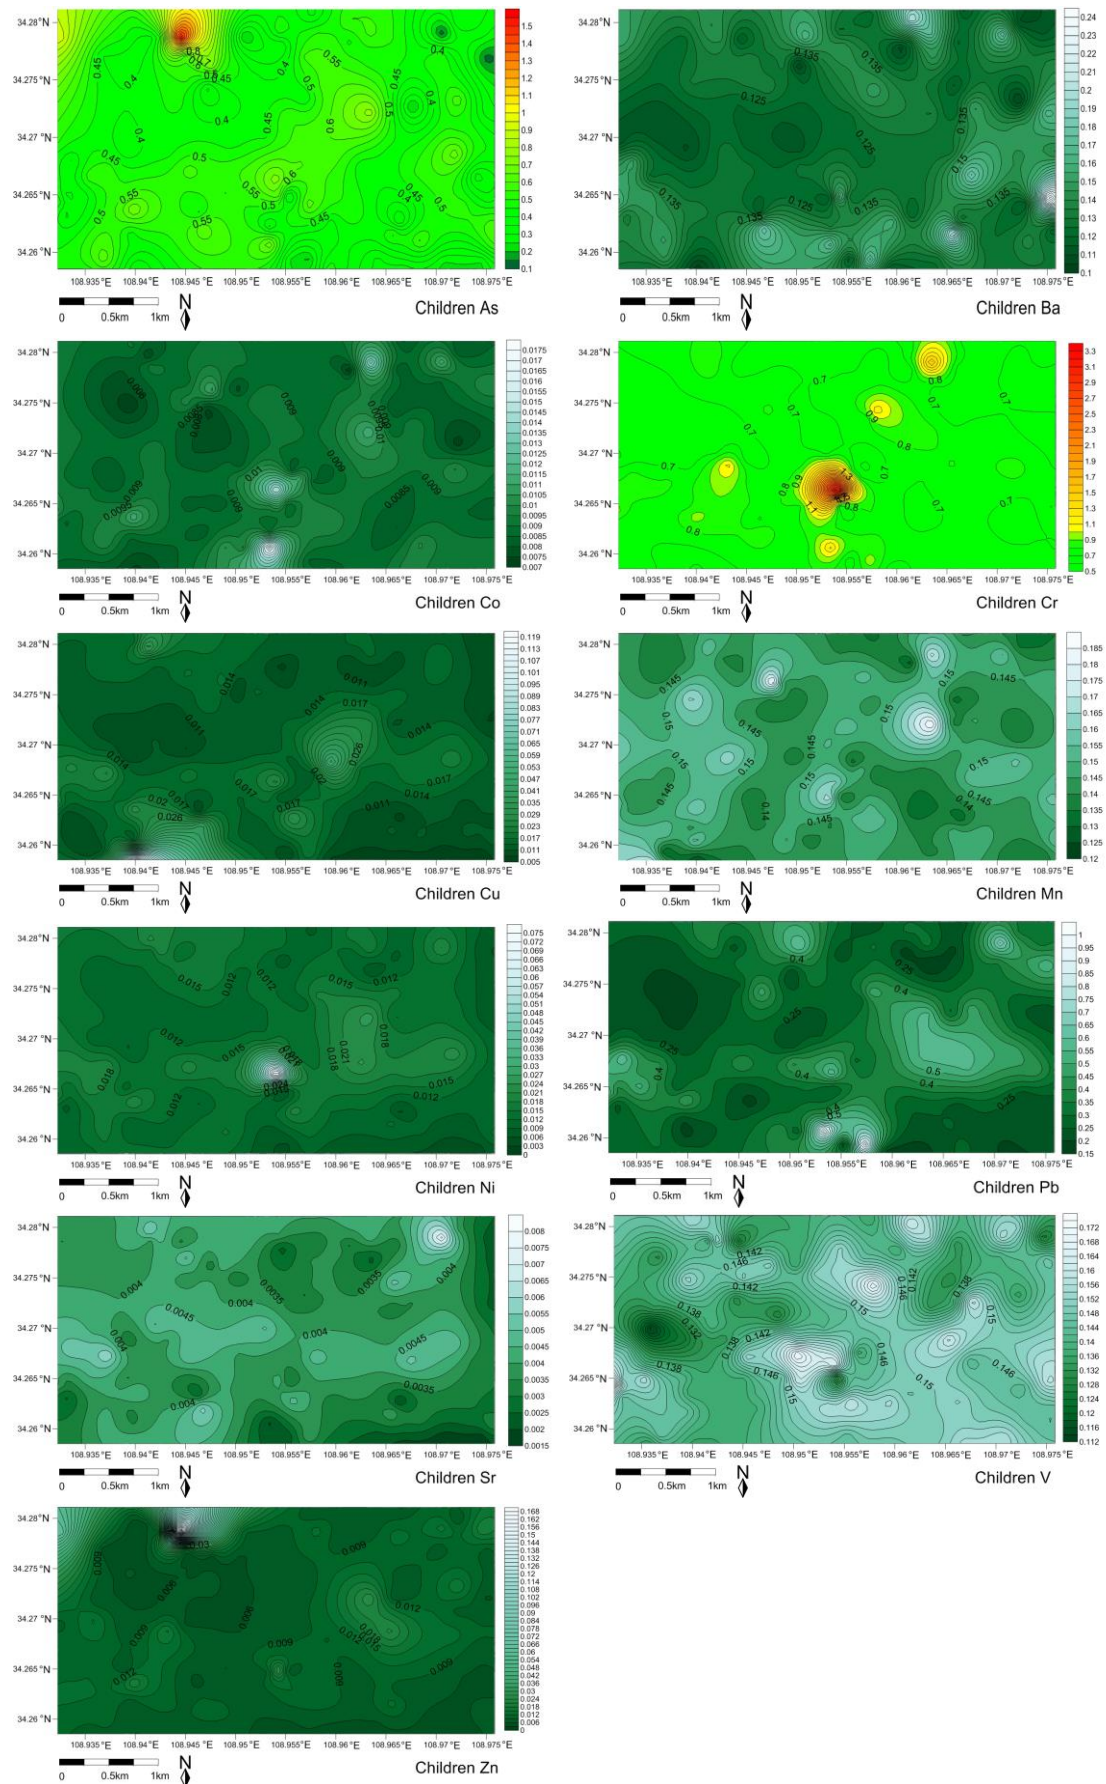

**Fig. S3** The spatial risk of non-carcinogenic of trace metals/metalloids exposed to children

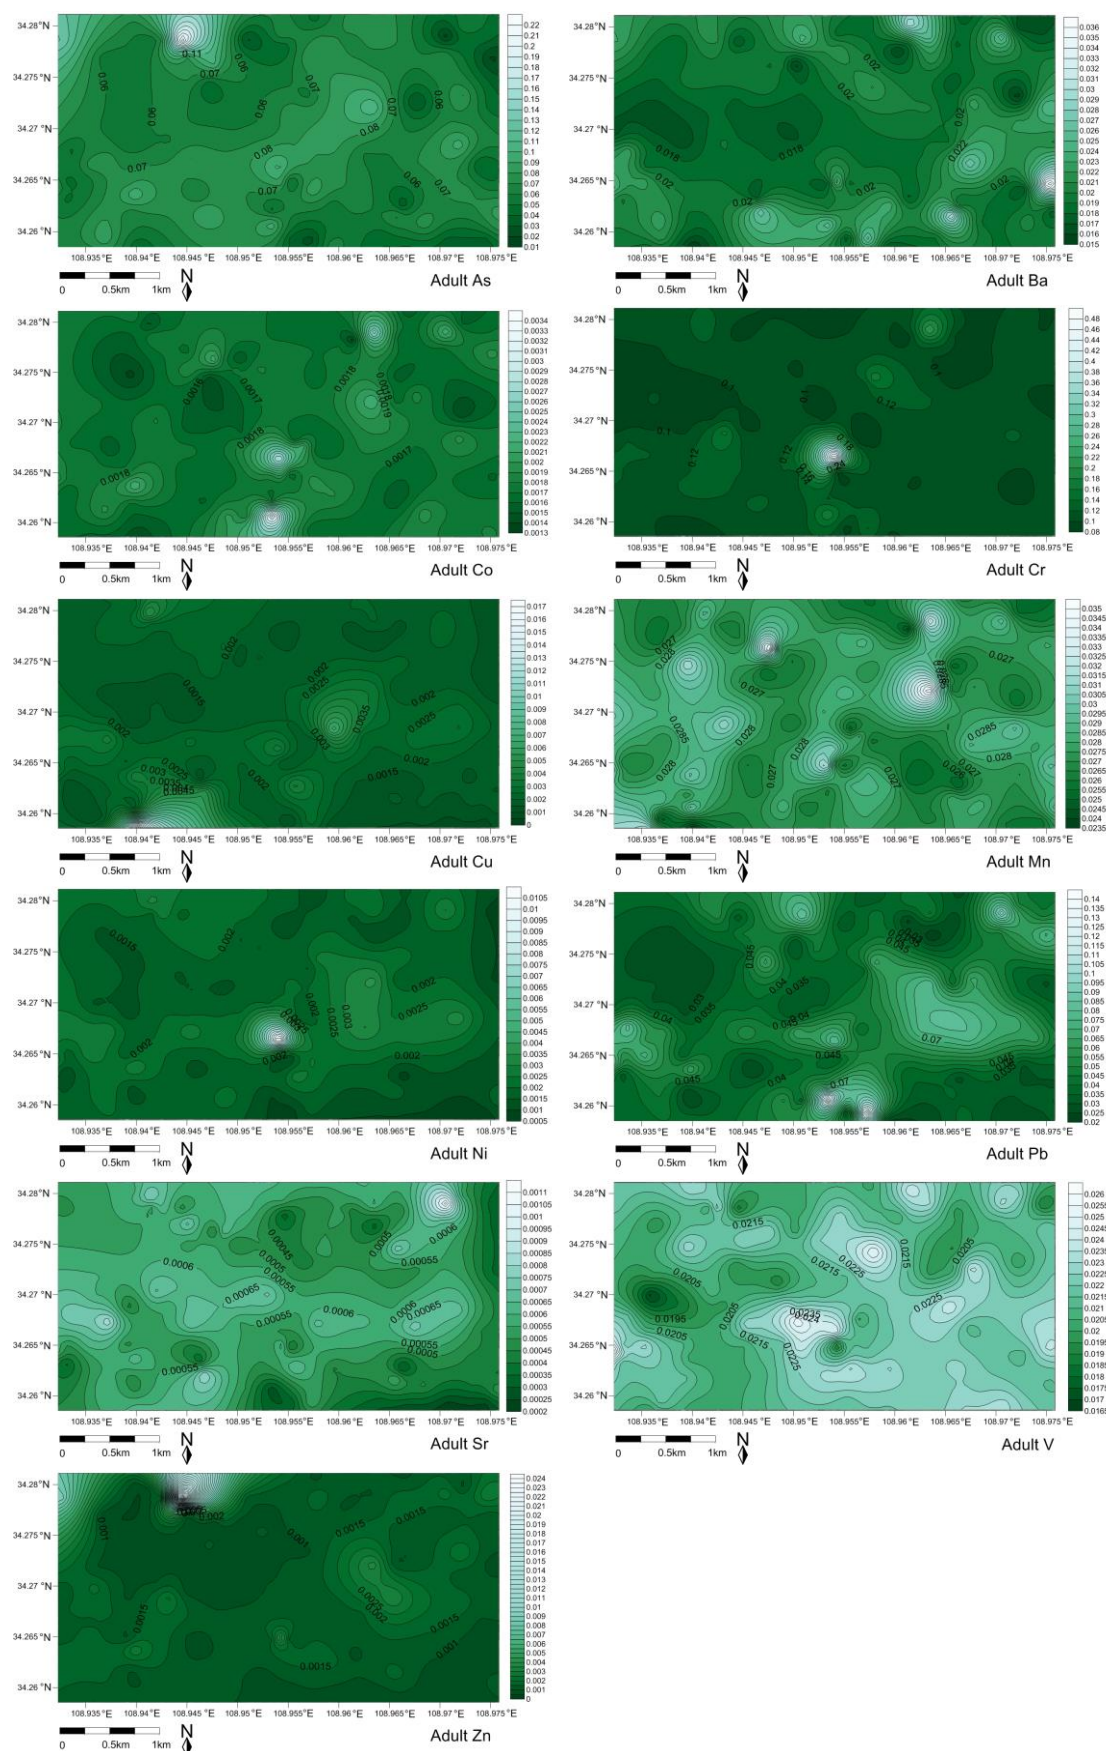

**Fig. S4** The spatial risk of non-carcinogenic of trace metals/metalloids exposed to adults



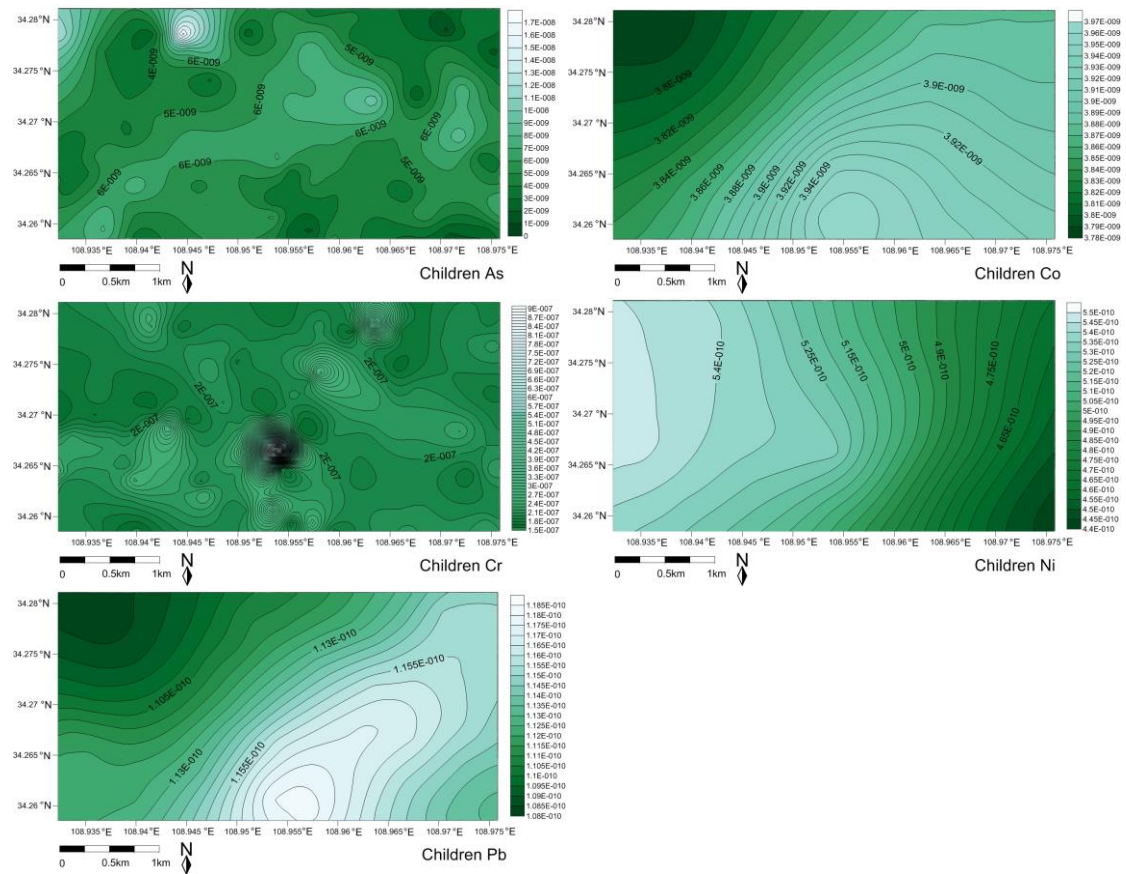

**Fig.S5** The spatial risk of carcinogenic of trace metals/metalloids exposed to children

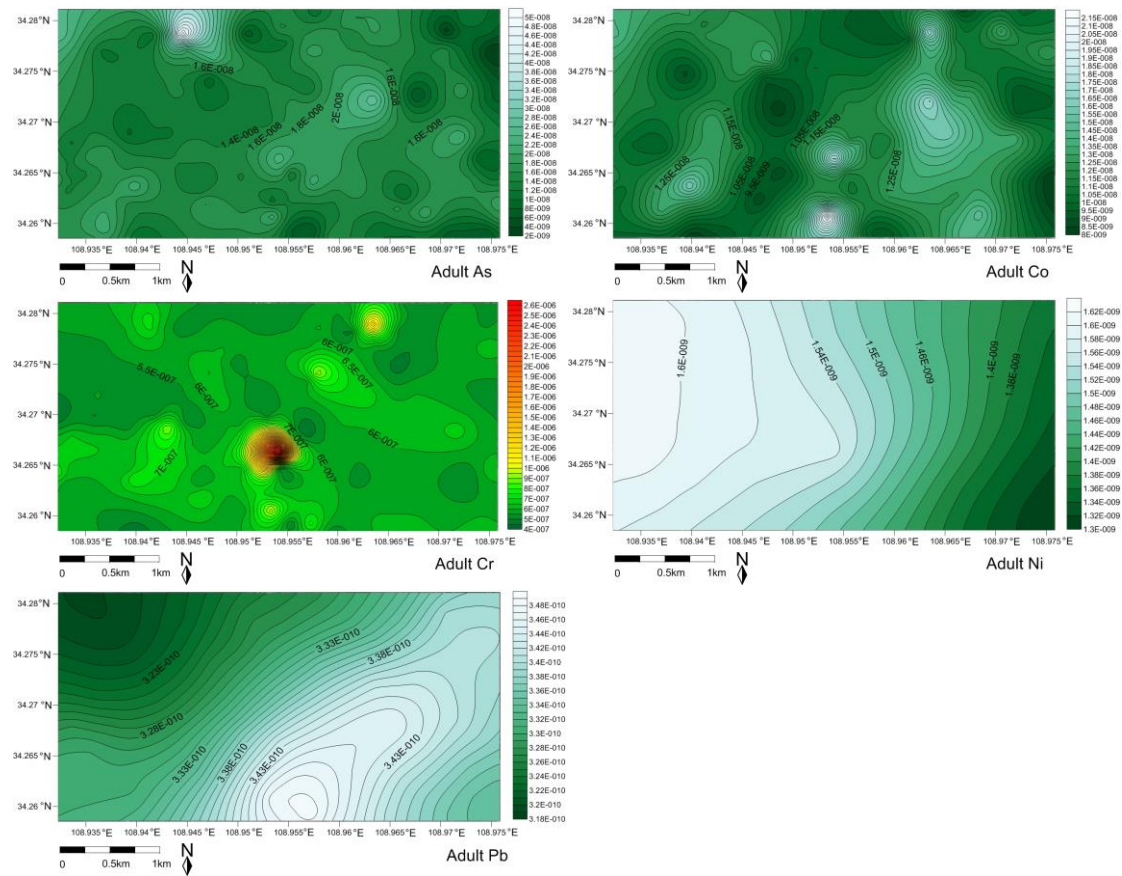

**Fig.S6** The spatial risk of carcinogenic of trace metals/metalloids exposed to adults
